# Supplementary material for: Human Artificial Chromosomes that Bypass Centromeric DNA
Source: PubMed Central journal article supplement (PMC6657561; doi:10.1016/j.cell.2019.06.006), 2019-07-25
Supplement: mmc1.pdf [file mmc1.pdf]

**Cell, Volume 178**

**Supplemental Information**

**Human Artificial Chromosomes**

**that Bypass Centromeric DNA**

**Glennis A. Logsdon, Craig W. Gambogi, Mikhail A. Liskovykh, Evelyne J. Barrey, Vladimir Larionov, Karen H. Miga, Patrick Heun, and Ben E. Black**

# Logsdon et al., Table S1

| BAC      | Neocentromere to which the BAC insert is proximal | Coordinates of BAC insert in hg38      | Coordinates of neocentromere in hg38 | Distance between BAC insert and neocentromere |
|----------|---------------------------------------------------|----------------------------------------|--------------------------------------|-----------------------------------------------|
| 4q21 BAC | PD-NC4                                            | chr4:86,937,133-87,119,178 [~182 kb]   | chr4:87,228,848 -87,628,848          | 109,670 bp                                    |
| 4q22 BAC | PD-NC4                                            | chr4:87,260,058-87,426,318 [~166 kb]   | chr4:87,228,848 -87,628,848          | Located within                                |
| 4q28 BAC | ---                                               | chr4:128,716,484-128,873,622 [~157 kb] | ---                                  | ---                                           |
| 8q21 BAC | MS4221                                            | chr8:85,793,719-85,805,252 [~183 kb]*  | chr8:85,587,771 -85,887,771          | Located within                                |

**Table S1. Genomic Sequence Locations of the Non- $\alpha$ -satellite BAC<sup>LacO</sup> Constructs, Related to Figure 3.**

Chromosomal coordinates of the genomic sequences in the non- $\alpha$ -satellite BAC<sup>LacO</sup> constructs relative to neocentromeres (Hasson et al., 2013). The asterisk indicates a construct (8q21 BAC<sup>LacO</sup>) that consists almost entirely of ~12 kb repeats. In the hg38 reference genome, the 8q21 BAC<sup>LacO</sup> insert aligns to a single repeat; however, the actual size of the 8q21 BAC<sup>LacO</sup> genomic insert is ~183 kb.

| Clone | Distribution of CENP-A ChIP reads |          |      |         | Experiment                                 |
|-------|-----------------------------------|----------|------|---------|--------------------------------------------|
|       | 4q21                              | Backbone | LacO | Genomic |                                            |
| 1     | 81.7%                             | 17.6%    | 0.3% | 0.4%    | WT, +LacO<br>WT, -LacO<br>CENP-B KO, +LacO |
| 11    | 89.1%                             | 5.1%     | 0.6% | 5.2%    |                                            |
| 12    | 68.2%                             | 31.0%    | 0.7% | 0.1%    |                                            |
| 14    | 91.4%                             | 5.6%     | 1.1% | 1.9%    |                                            |
| 4     | 4.9%                              | 0.7%     | 0.1% | 94.3%   |                                            |
| 7     | 67.0%                             | 6.2%     | 0.2% | 26.6%   |                                            |
| 13    | 51.2%                             | 6.5%     | 0.5% | 41.8%   |                                            |
| 17    | 32.8%                             | 4.7%     | 0.5% | 62.0%   |                                            |

**Table S2. The Distribution of CENP-A ChIP Reads in the CENP-B- and Functional  $\alpha$ -Satellite-Negative 4q21 HACs, Related to Figure 4.**

Table summarizing the distribution of CENP-A ChIP reads in each of the 4q21 HACs lacking CENP-B and functional  $\alpha$ -satellite sequences. The top 4 clones have a centromere positioned almost entirely on the 4q21 and vector backbone sequences, whereas the bottom four clones have a centromere that is positioned on the 4q21 sequence, vector backbone, and host chromosome sequences (as shown in the "Genomic" column).

| Clone | Average copy number of the 4q21 sequence within the HAC | Average # of HACs / cell | Average size of HAC (Mb) | Experiment       |
|-------|---------------------------------------------------------|--------------------------|--------------------------|------------------|
| 1     | 53                                                      | 1.2                      | 9.0                      | WT, +LacO        |
| 11    | 55                                                      | 2.1                      | 5.3                      | CENP-B KO, +LacO |
| 12    | 41                                                      | 1.2                      | 6.9                      | CENP-B KO, +LacO |
| 14    | 46                                                      | 1.4                      | 6.7                      | CENP-B KO, +LacO |

**Table S3. Calculation to Determine the Average Size of Each HAC Whose Centromere is Essentially Comprised of 4q21 BAC<sup>LacO</sup>, Related to Figure 5.**

Table summarizing the average size of the 4q21 BAC<sup>LacO</sup> HACs formed without acquiring CENP-B- or CENP-A-associated sequences. Because these clones are comprised almost entirely of 4q21 BAC<sup>LacO</sup> sequences, their size can be accurately calculated using the following formula:  $(CN_H \times 0.203 \text{ Mb}) / H$ , where  $CN_H$  is the average copy number of the 4q21 sequence within the HAC, and  $H$  is the average # of HACs/cell.  $CN_H$ , itself, is calculated using the following formula:  $FE \times CN_p$ , where  $FE$  is the average fold-enrichment of the 4q21 sequence in the HAC clone (shown in Fig. S5A) and  $CN_p$  is the average raw copy number of the parental cell line (2.7, as determined by IF-FISH). All of the 4q21 BAC<sup>LacO</sup> HACs lacking acquired genomic sequences range in size from 5.3-9.0 Mb.

| Clone | Location of genomic CENP-A enrichment |                                                             | Experiment       |
|-------|---------------------------------------|-------------------------------------------------------------|------------------|
|       | $\alpha$ -satellite                   | non- $\alpha$ -satellite                                    |                  |
| 4     | chr10:41,544,942-42,110,942           | chr6:168,294,667-168,314,200<br>chr16:87,197,849-87,199,200 | WT, +LacO        |
| 7     | chr16:34,245,822-34,289,488           | chr5:47,152,890-47,303,000                                  | WT, -LacO        |
| 13    | chrX:62,499,084-62,499,160            | --                                                          | CENP-B KO, +LacO |
| 17    | chr10:41,487,500-41,767,500           | chr3:116,741,534-116,745,800<br>chr9:99,135,406-99,156,500  |                  |

**Table S4. Genomic Coordinates of the CENP-A-Enriched Regions in the 4q21 HAC Clones that Have Acquired Endogenous Sequences from Host Chromosomes, Related to Figure 5.**

Table summarizing the genomic location of CENP-A enrichment in 4q21 HACs lacking CENP-B and functional  $\alpha$ -satellite sequences. Clone 13 has acquired only  $\alpha$ -satellite sequences, while clones 4, 7, and 17 have acquired both  $\alpha$ -satellite and non- $\alpha$ -satellite sequences during HAC formation.

## Logsdon et al., Table S5

| Locus           | Size (bp)     | % GC  | % SINE | % LINE | % LTR | % DNA repeat | % Simple repeat | % Low complexity repeat | % Satellite |
|-----------------|---------------|-------|--------|--------|-------|--------------|-----------------|-------------------------|-------------|
| 4q21            | 182,046       | 41.1% | 20.5%  | 9.5%   | 1.8%  | 4.0%         | 0.6%            | 0.5%                    | 0.0%        |
| 4q21 upstream   | 182,046       | 40.5% | 21.9%  | 16.9%  | 9.0%  | 1.7%         | 0.6%            | 0.7%                    | 0.0%        |
| 4q21 downstream | 182,046       | 39.1% | 19.2%  | 15.6%  | 10.4% | 5.1%         | 0.7%            | 0.8%                    | 0.0%        |
| 3q13            | 4,267         | 39.2% | 0.0%   | 35.2%  | 2.1%  | 0.0%         | 1.1%            | 0.8%                    | 0.0%        |
| 3q13 upstream   | 4,267         | 34.0% | 8.2%   | 17.0%  | 0.0%  | 5.7%         | 1.1%            | 0.0%                    | 0.0%        |
| 3q13 downstream | 4,267         | 39.6% | 0.0%   | 83.2%  | 0.0%  | 0.0%         | 0.6%            | 0.0%                    | 0.0%        |
| 9q22            | 21,095        | 37.4% | 10.3%  | 17.67% | 2.8%  | 2.9%         | 0.3%            | 0.4%                    | 0.0%        |
| 9q22 upstream   | 21,095        | 37.4% | 10.7%  | 13.7%  | 2.9%  | 5.2%         | 0.4%            | 0.5%                    | 0.0%        |
| 9q22 downstream | 21,095        | 43.1% | 14.1%  | 31.2%  | 8.7%  | 3.0%         | 1.4%            | 0.1%                    | 0.0%        |
| 4q22            | 166,262       | 40.6% | 21.4%  | 13.3%  | 21.9% | 4.0%         | 0.7%            | 0.6%                    | 0.0%        |
| 4q22 upstream   | 166,262       | 39.0% | 18.7%  | 15.4%  | 4.3%  | 4.2%         | 0.7%            | 0.6%                    | 0.0%        |
| 4q22 downstream | 166,262       | 39.0% | 17.6%  | 20.7%  | 8.8%  | 5.3%         | 0.9%            | 0.8%                    | 0.0%        |
| 4q28            | 157,140       | 43.0% | 25.3%  | 8.1%   | 8.1%  | 2.2%         | 0.7%            | 0.4%                    | 0.0%        |
| 4q28 upstream   | 157,140       | 41.8% | 21.2%  | 12.5%  | 19.1% | 2.6%         | 0.6%            | 0.5%                    | 0.0%        |
| 4q28 downstream | 157,140       | 35.7% | 8.9%   | 40.6%  | 3.6%  | 2.7%         | 0.4%            | 0.5%                    | 0.0%        |
| 8q21            | 11,535        | 47.5% | 10.2%  | 38.3%  | 0.8%  | 1.9%         | 0.3%            | 0.2%                    | 0.0%        |
| 8q21 upstream   | 11,535        | 47.0% | 10.2%  | 39.5%  | 0.8%  | 7.1%         | 0.3%            | 0.2%                    | 0.0%        |
| 8q21 downstream | 11,535        | 47.1% | 9.5%   | 38.3%  | 0.8%  | 6.2%         | 0.3%            | 0.0%                    | 0.0%        |
| Whole genome    | 3,099,922,541 | 40.9% | 12.6%  | 19.9%  | 8.5%  | 3.2%         | 0.8%            | 0.5%                    | 2.1%        |

**Table S5. Genomic Content of the Sequences Tested in this Study and Those Acquired During HAC formation, Related to Figure 5.**

The GC content and abundance of repeat elements is indicated for the non- $\alpha$ -satellite sequences tested in this study and their flanking regions, as well as sequences acquired by clone 17 during HAC formation. A whole-genome analysis is also shown for comparison. We did not observe a clear enrichment for particular repeat elements within the 4q21, 3q13, and 9q22 sequences compared to their flanking regions, other sequences tested in this study, or the whole genome, so we conclude that there is no clear correlation between repeat element abundance and the formation of centromeric chromatin. If there is a genetic code that positively affects the assembly of centromeric chromatin on HAC templates comprised of non-centromeric DNA repeats, it is too cryptic to be ascertained from standard analysis of our data. However, one can imagine many genetic elements absent in our tested sequences (e.g. strong promoters, super enhancers, etc.) that could have negatively affected centromeric chromatin assembly.

| Clone | Percentage of cells containing a HAC | Figure referenced                          | Experiment                            |
|-------|--------------------------------------|--------------------------------------------|---------------------------------------|
| 1     | 85%                                  | 3B,C; 4B-F; 5A,D; 6; S3; S4A; S5A,C; S6B,C | 4q21, WT, +LacO                       |
| 2     | 100%                                 | 3B; 4B,F; S3A                              | 4q21, WT, -LacO                       |
| 3     | 95%                                  | 3B,C; 4B,D,F; 5D,E; S3; S6D                | 4q21, CENP-B KO, +LacO                |
| 4     | 100%                                 | 3B; 4B,D,F; S3A,B; S4B; S5B                | chr7 $\alpha$ -sat, WT, +LacO         |
| 5     | 80%                                  | 3B; 4B,F; S3A                              | chr11 $\alpha$ -sat, WT, +LacO        |
| 6     | 100%                                 | 3B; 4B,F                                   | chr11 $\alpha$ -sat, CENP-B KO, +LacO |
| 7     | 100%                                 | 3D; 4B,F; S3A; S4B; S5B                    |                                       |
| 8     | 55%                                  | 3D; 4B,C,F                                 |                                       |
| 9     | 90%                                  | 3D; 4B,F                                   |                                       |
| 10    | 55%                                  | 3D,E; 4B,F; S3A                            |                                       |
| 11    | 75%                                  | 3F; 4D,F; 5A,D; S3B-D; S4A; S5A,C; S6B     |                                       |
| 12    | 100%                                 | 3F; 4D,F; 5A,D; S3B-D; S4A; S5A,C; S6B     |                                       |
| 13    | 90%                                  | 3F,G; 4D,F; 5B; S3B-D; S4B; S5B            |                                       |
| 14    | 75%                                  | 3F; 4D,F; 5A,D; S3B-D; S4A; S5A,C; S6B     |                                       |
| 15    | 95%                                  | 3F; 4D,F                                   |                                       |
| 16    | 85%                                  | 3F,G; 4D-F                                 |                                       |
| 17    | 100%                                 | 3F; 4D,F; 5B; S3B-D; S4B; S5B,C; S6A       |                                       |
| 18    | 95%                                  | 1D,F                                       |                                       |
| 19    | 95%                                  | 1D-F                                       |                                       |
| 20    | 100%                                 | 1D,F                                       |                                       |
| 21    | 65%                                  | 1D,F                                       |                                       |
| 22    | 85%                                  | 1D,F                                       |                                       |
| 23    | 85%                                  | 1D,F                                       |                                       |
| 24    | 95%                                  | 1D,F-H; 2F,G,I,J                           |                                       |
| 25    | 55%                                  | 1D,F                                       |                                       |
| 26    | 60%                                  | 1D,F                                       |                                       |
| 27    | 100%                                 | 1D-F; 2G                                   |                                       |
| 28    | 55%                                  | 1D,F                                       |                                       |
| 29    | 100%                                 | 1G,H                                       |                                       |
| 30    | 90%                                  | 1G,H                                       |                                       |
| 31    | 95%                                  | 1G,H                                       |                                       |
| 32    | 95%                                  | 2D,F,G                                     |                                       |
| 33    | 85%                                  | 2D,F                                       |                                       |
| 34    | 100%                                 | 2D,F,G                                     |                                       |
| 35    | 95%                                  | 2D-G                                       |                                       |
| 36    | 85%                                  | 2D,F                                       |                                       |
| 37    | 95%                                  | 2D,F                                       |                                       |
| 38    | 85%                                  | 2D,F                                       |                                       |
| 39    | 55%                                  | 2D,F                                       |                                       |
| 40    | 65%                                  | 2D,F                                       |                                       |
| 41    | 100%                                 | 2I,J; S1                                   |                                       |
| 42    | 90%                                  | 2I,J                                       |                                       |
| 43    | 90%                                  | 2I,J                                       |                                       |

**Table S6. Summary of the HAC Clones Generated in This Study, Related to STAR Methods.**

All clones generated in this study have a HAC in at least 55% of cells, with the vast majority having a HAC in at least 85% of cells. The relevant figures that the HAC clones are described in is listed.
